# Supplementary material for: Changes in Treatment Patterns and Costs for Lung Cancer Have Not Resulted in Relevant Improvements in Survival: A Population-Based Observational Study in Catalonia
Source: MDPI journal article supplement (doi:10.3390/cancers14235791), 2022-11-24
Supplement: s1 [file s1]

## Supplementary material

**Table S1.** Treatment pattern subgroup initiated in 2014 and 2018, by age group.

| Age<br>(years) | Treatment patterns       | 2014<br>(n=3,412) |      | 2018<br>(n=3,609) |      |
|----------------|--------------------------|-------------------|------|-------------------|------|
|                |                          | n                 | %    | n                 | %    |
| Global         | Surgery                  | 494               | 14.5 | 643               | 17.7 |
|                | Surgery+RT               | 35                | 1.0  | 12                | 0.3  |
|                | NACT±RT+surgery          | 37                | 1.1  | 39                | 1.1  |
|                | NACT+ACT±RT+surgery      | 14                | 0.4  | 7                 | 0.2  |
|                | ACT±RT+surgery           | 156               | 4.6  | 179               | 5.0  |
|                | IND+RT±SEQ               | 76                | 2.2  | 63                | 1.7  |
|                | CONCO+RT                 | 0                 | 0.0  | 0                 | 0.0  |
|                | RT                       | 54                | 1.6  | 65                | 1.8  |
|                | Unresectable tumor       | 1075              | 31.5 | 1090              | 30.2 |
|                | Without systemic therapy | 1471              | 43.1 | 1511              | 41.9 |
| <60            | Surgery                  | 99                | 12.3 | 167               | 17.8 |
|                | Surgery+RT               | 8                 | 1.0  | 3                 | 0.3  |
|                | NACT±RT+surgery          | 15                | 1.9  | 15                | 1.6  |
|                | NACT+ACT±RT+surgery      | 10                | 1.2  | 4                 | 0.4  |
|                | ACT±RT+surgery           | 49                | 6.1  | 59                | 6.3  |
|                | IND+RT±SEQ               | 22                | 2.7  | 24                | 2.6  |
|                | CONCO+RT                 | 0                 | 0.0  | 0                 | 0.0  |
|                | RT                       | 5                 | 0.6  | 11                | 1.2  |
|                | Unresectable tumor       | 371               | 46.1 | 369               | 39.4 |
|                | Without systemic therapy | 226               | 28.1 | 285               | 30.4 |
| 60-69          | Surgery                  | 188               | 17.9 | 240               | 20.0 |
|                | Surgery+RT               | 14                | 1.3  | 3                 | 0.2  |
|                | NACT±RT+surgery          | 13                | 1.2  | 19                | 1.6  |
|                | NACT+ACT±RT+surgery      | 2                 | 0.2  | 3                 | 0.2  |
|                | ACT±RT+surgery           | 64                | 6.1  | 85                | 7.1  |
|                | IND+RT±SEQ               | 33                | 3.1  | 19                | 1.6  |
|                | CONCO+RT                 | 0                 | 0.0  | 0                 | 0.0  |
|                | RT                       | 11                | 1.0  | 20                | 1.7  |
|                | Unresectable tumor       | 382               | 36.3 | 398               | 33.1 |
|                | Without systemic therapy | 346               | 32.9 | 415               | 34.5 |
| 70-79          | Surgery                  | 177               | 17.1 | 210               | 20.2 |
|                | Surgery+RT               | 11                | 1.1  | 3                 | 0.3  |
|                | NACT±RT+surgery          | 8                 | 0.8  | 5                 | 0.5  |
|                | NACT+ACT±RT+surgery      | 2                 | 0.2  | 0                 | 0.0  |
|                | ACT±RT+surgery           | 43                | 4.2  | 33                | 3.2  |
|                | IND+RT±SEQ               | 19                | 1.8  | 20                | 1.9  |
|                | CONCO+RT                 | 0                 | 0.0  | 0                 | 0.0  |
|                | RT                       | 25                | 2.4  | 29                | 2.8  |
|                | Unresectable tumor       | 269               | 26.0 | 275               | 26.5 |
|                | Without systemic therapy | 481               | 46.5 | 464               | 44.7 |
| ≥80            | Surgery                  | 30                | 5.8  | 26                | 6.0  |
|                | Surgery+RT               | 2                 | 0.4  | 3                 | 0.7  |
|                | NACT±RT+surgery          | 1                 | 0.2  | 0                 | 0.0  |
|                | NACT+ACT±RT+surgery      | 0                 | 0.0  | 0                 | 0.0  |

|                          |     |      |     |      |
|--------------------------|-----|------|-----|------|
| ACT±RT+surgery           | 0   | 0.0  | 2   | 0.5  |
| IND+RT±SEQ               | 2   | 0.4  | 0   | 0.0  |
| CONCU+RT                 | 0   | 0.0  | 0   | 0.0  |
| RT                       | 13  | 2.5  | 5   | 1.2  |
| Unresectable tumor       | 53  | 10.2 | 48  | 11.1 |
| Without systemic therapy | 418 | 80.5 | 347 | 80.5 |

Note: NACT±RT: neoadjuvant treatment, with or without complementary radiotherapy, administered prior to surgery; can also include different lines of treatment for tumor recurrence. NACT+ACT±RT: neoadjuvant and adjuvant treatment, with or without complementary radiotherapy, administered prior to surgery; can also include different lines of treatment for tumor recurrence. ACT±RT: adjuvant treatment, with or without complementary radiotherapy, administered prior to surgery; can also include different lines of treatment for tumor recurrence. IND+RT±SEQ: induction therapy, started prior to the first session of radiotherapy with curative intent, with or without sequential therapy; can also include different lines of treatment for tumor recurrence. CONCO+RT: pharmacological treatment concomitant to radiotherapy with a curative intent; can also include different lines of treatment for tumor recurrence. Unresectable tumor: pharmacological treatments for an unresectable tumor. Without systemic therapy: Patients who do not receive any of the treatments described above.

**Table S2.** Pharmacological treatments with <10% of utilization or > 10 patients.

|                                                                                       | 2014                                                                                                                                                                                                                                                                                                                                                                                                                                                                                                                                                                                          | 2018                                                                                                                                                                                                                                                                                                                                                                                                                                                                                                                                                                                                                                                                                                            |
|---------------------------------------------------------------------------------------|-----------------------------------------------------------------------------------------------------------------------------------------------------------------------------------------------------------------------------------------------------------------------------------------------------------------------------------------------------------------------------------------------------------------------------------------------------------------------------------------------------------------------------------------------------------------------------------------------|-----------------------------------------------------------------------------------------------------------------------------------------------------------------------------------------------------------------------------------------------------------------------------------------------------------------------------------------------------------------------------------------------------------------------------------------------------------------------------------------------------------------------------------------------------------------------------------------------------------------------------------------------------------------------------------------------------------------|
| <b>Pre-surgery and neoadjuvant therapies</b>                                          | platinum+antifolate (6%); taxane (4%) and platinum+antifolate (6%)                                                                                                                                                                                                                                                                                                                                                                                                                                                                                                                            | platinum+podophyllotoxin derivative (9%); platinum+antifolate (4%); taxane (4%); pyrimidine analogues+taxane (2%); AAT (1%)                                                                                                                                                                                                                                                                                                                                                                                                                                                                                                                                                                                     |
| <b>Post-surgery and adjuvant therapies</b>                                            | Taxane (4%); platinum+taxane (2%); platinum+antifolate (2%); antifolate (<1%).                                                                                                                                                                                                                                                                                                                                                                                                                                                                                                                | platinum+podophyllotoxin derivative (5%); platinum+taxane (4%); taxane (2%); TOP1 (<1%); BRAF-TKI+MEK-TKI (<1%); antifolate (<1%)                                                                                                                                                                                                                                                                                                                                                                                                                                                                                                                                                                               |
| <b>Pre-radiotherapy and induction therapies</b>                                       | platinum+vinca alkaloids (9%); antifolate+platinum (7%); platinum+taxane (4%); antifolate (3%); platinum+pyrimidine analogs (<1%); EGFR-inh+platinum (<1%); antifolate+platinum+vinca alkaloids (<1%); AAT+platinum+pyrimidine analogs (<1%).                                                                                                                                                                                                                                                                                                                                                 | platinum+podophyllotoxin derivative (9%); platinum+taxane (9%); platinum+antifolate (9%); platinum+pyrimidine analogs+taxane (3%); platinum+pyrimidine analogs (5%); pyrimidine analogs (3%); ICI (2%); vinca alkaloids+ICI (2%); EGFR-inh (2%); platinum+podophyllotoxin derivative+vinca alkaloids (2%).                                                                                                                                                                                                                                                                                                                                                                                                      |
| <b>First-line treatment for unresectable tumors - Other chemotherapy regimens</b>     | platinum+vinca alkaloids (3%); vinca alkaloids (3%); platinum+taxane (9%); platinum (6%); pyrimidine analogs TOP1 (2%), others+platinum(<1%), platinum+podophyllotoxin derivative (<1%), platinum+pyrimidine analogs+taxane(<1%), platinum+pyrimidine pyrimidine analogs+taxane (<1%), platinum+TOP1 (<1%), pyrimidine analogs+TOP1 (<1%), pyrimidine analogs+vinca alkaloids (<1%), pyrimidine analogs+taxane(<1%), pyrimidine analogs+TOP1 (<1%), taxane+antifolate (<1%), antifolate+platinum+taxane(<1%), platinum+vinca alkaloids(<1%) and antifolate+platinum+pyrimidine analogs (<1%). | platinum+taxane (9%); platinum (6%); pyrimidine analogs (5%) antifolate (4%), taxane (3%); platinum+antifolate (2%), podophyllotoxin derivative (1%), antifolate+ICI+platinum (<1%), others+platinum+podophyllotoxin derivative (<1%), platinum+podophyllotoxin derivative+TOP1 (<1%), platinum+vinca alkaloids (<1%), pyrimidine analogs+TOP1 (<1%), pyrimidine analogs+taxane (<1%), pyrimidine analogs+taxane (<1%), antifolate+platinum+pyrimidine analogs (<1%), platinum+pyrimidine analogs+TOP1 (<1%), platinum+TOP1 (<1%), platinum+taxane+vinca alkaloids (<1%), pyrimidine analogs+TOP1, platinum+pyrimidine analogs+taxane (<1%), TOP1 (<1%), vinca alkaloids (<1%), platinum+vinca alkaloids (<1%). |
| <b>First-line treatment for unresectable tumors - Other non-chemotherapy regimens</b> | AAT+antifolate (<1%), AAT+antifolate+platinum (<1%), AAT+TOP1+platinum (<1%), EGFR-inh+platinum (<1%), EGFR-inh+pyrimidine analogs (<1%), EGFR-inh+pyrimidine analogs+platinum+taxane (<1%), EGFR-TKI+antifolate (<1%), EGFR-inh+TOP1(<1%), platinum+vinca alkaloids (<1%), EGFR-inh(<1%) and AAT+platinum+pyrimidine analogs(<1%).                                                                                                                                                                                                                                                           | AAT (<1%), AAT+antifolate (<1%), AAT+antifolate+platinum (<1%), AAT+platinum+taxane (<1%), AAT+taxane (<1%), , EGFR-inh (<1%), EGFR-inh+platinum+pyrimidine analogs (<1%), EGFR-inh+pyrimidine analogs (<1%), taxane+AAT (<1%), AAT+platinum (<1%), AAT+platinum+pyrimidine analogs (<1%), EGFR-inh+platinum (<1%), mTOR-TKI (<1%), BRAF-TKI+MEK-TKI (<1%).                                                                                                                                                                                                                                                                                                                                                     |

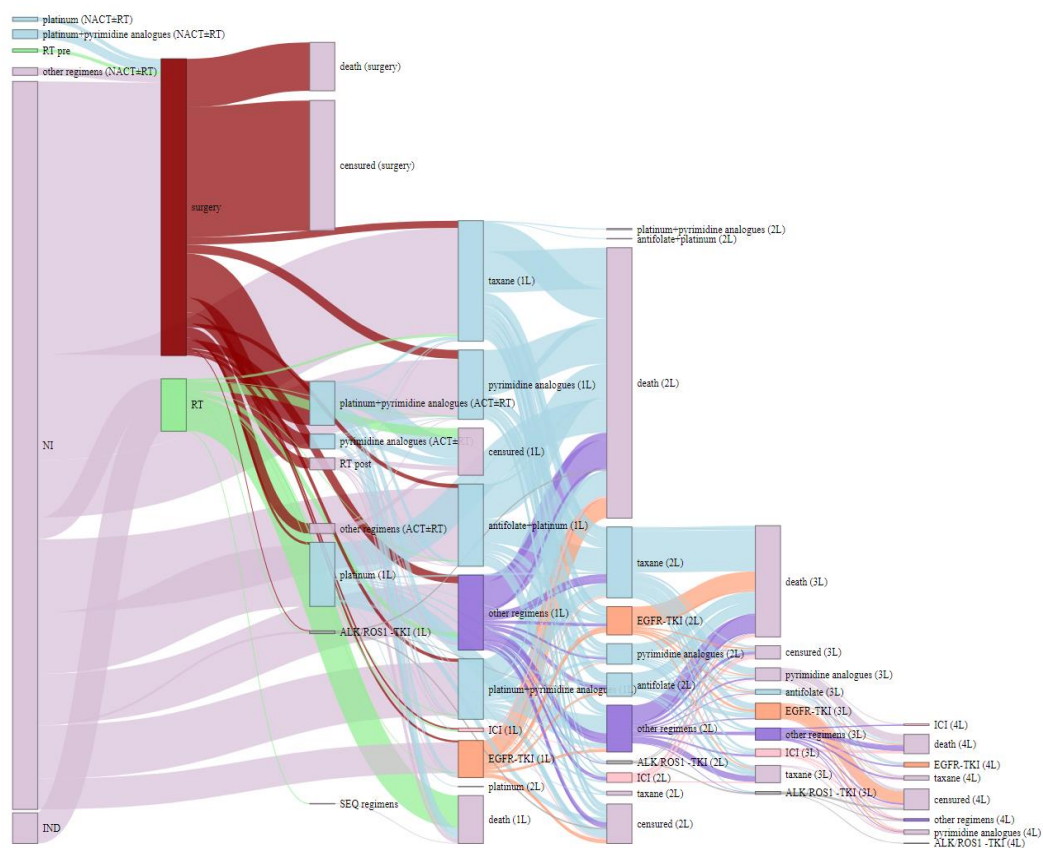

**Figure S1.** Sequences of procedures initiated in 2014. Note: figure includes pharmacological regimens, including those targeting biomarkers (ICI, ITK EGFR and ITK ALK/ROS1) representing > 10% of the treatment strategy or > 10 patients

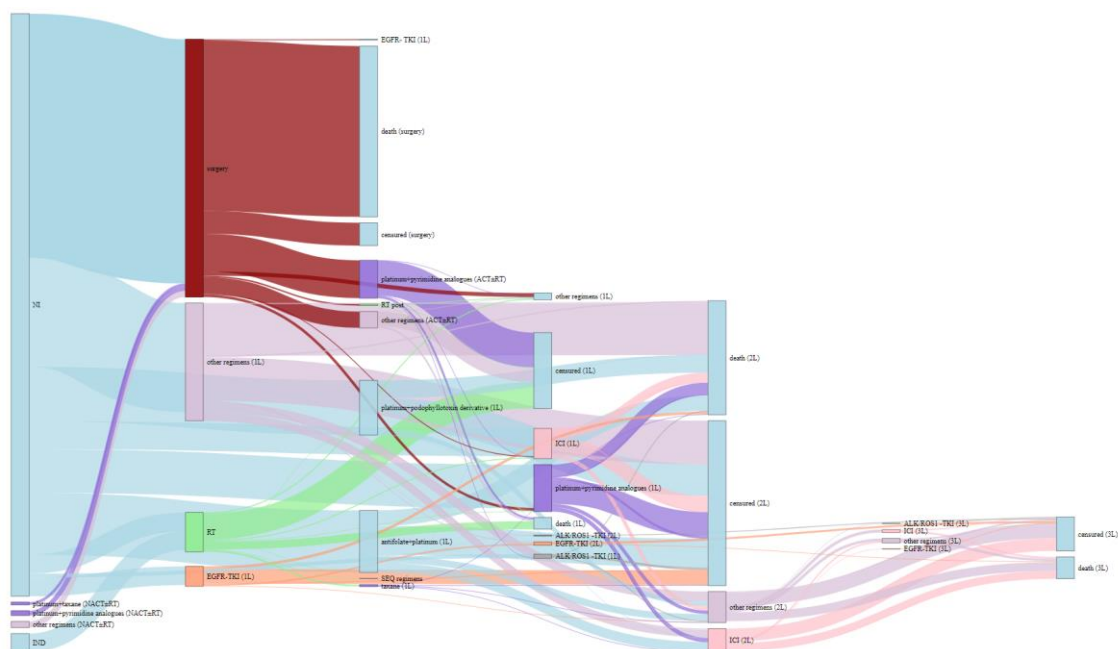

**Figure S2.** Sequences of procedures initiated in 2018. Note: figure includes pharmacological regimens, including those targeting biomarkers (ICI, ITK EGFR and ITK ALK/ROS1) representing > 10% of the treatment strategy or > 10 patients

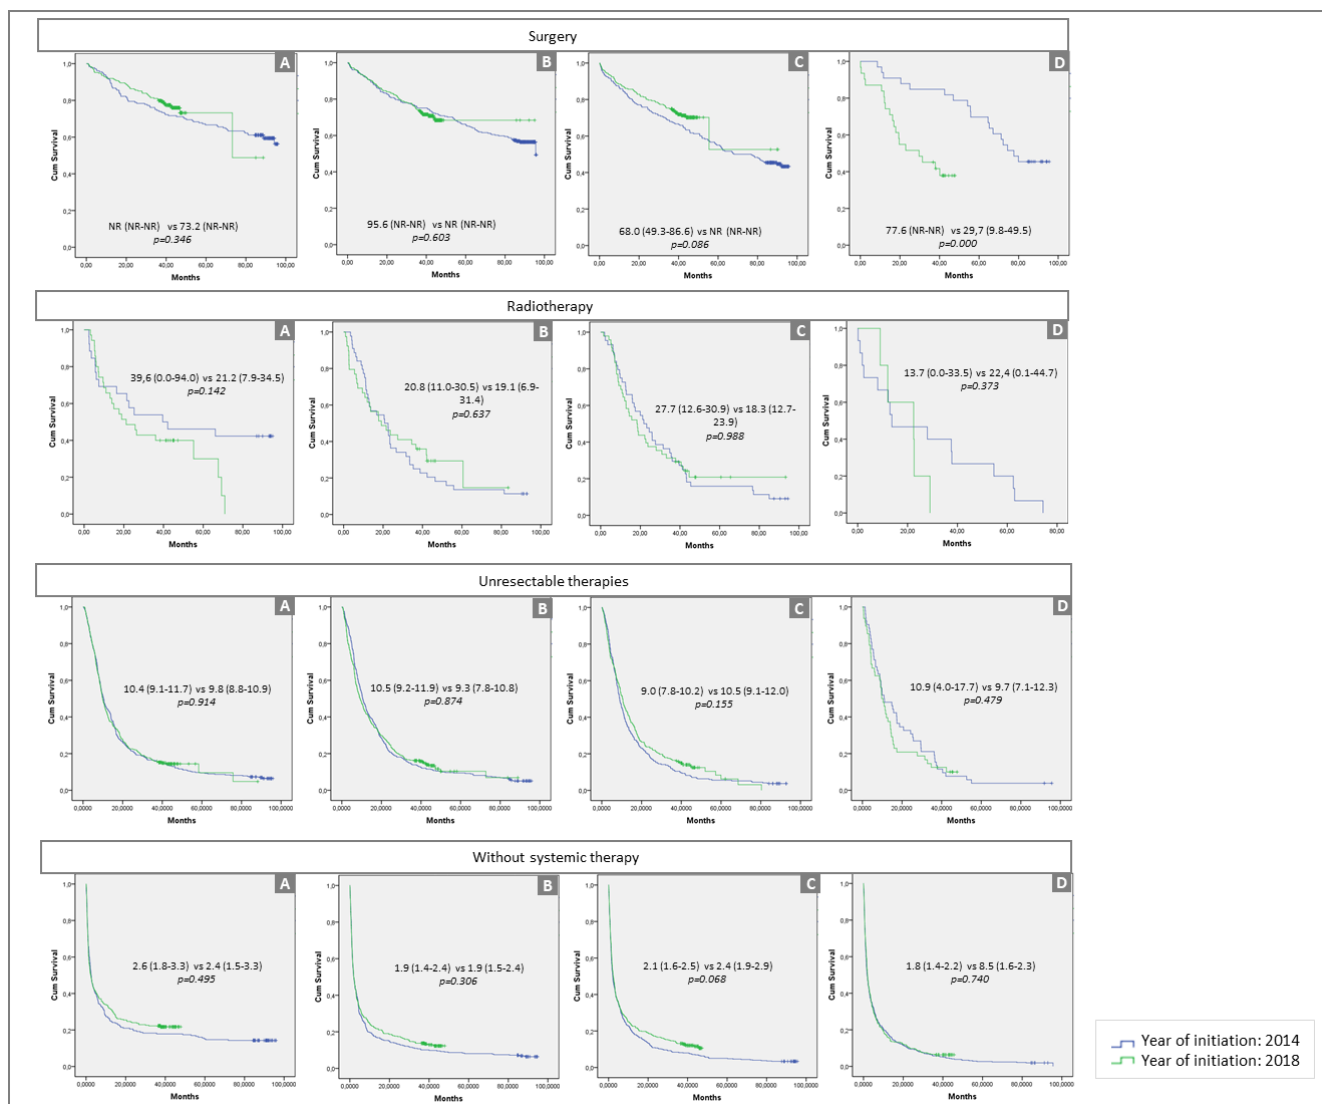

**Figure S3.** Kaplan-Meier curves for estimating overall survival who received first treatment in 2014 and 2018, by age group and treatment pattern. A: <60 years; B: 60-69 years; C: 70-79 years; D: >80 years. NR: not reached. Surgery: patients receiving surgery with a curative intent with or without neo-adjuvant and/or adjuvant pharmacological treatment, and/or complementary radiotherapy; also includes different lines of treatment for tumor recurrence. Radiotherapy: patients with radiotherapy with a curative intent, with or without pharmacological treatments; also includes different lines of treatment for tumor recurrence. Unresectable tumor: patients who only receive pharmacological treatments with a palliative intent. Without systemic therapy: patients who do not receive any of the treatments described above.

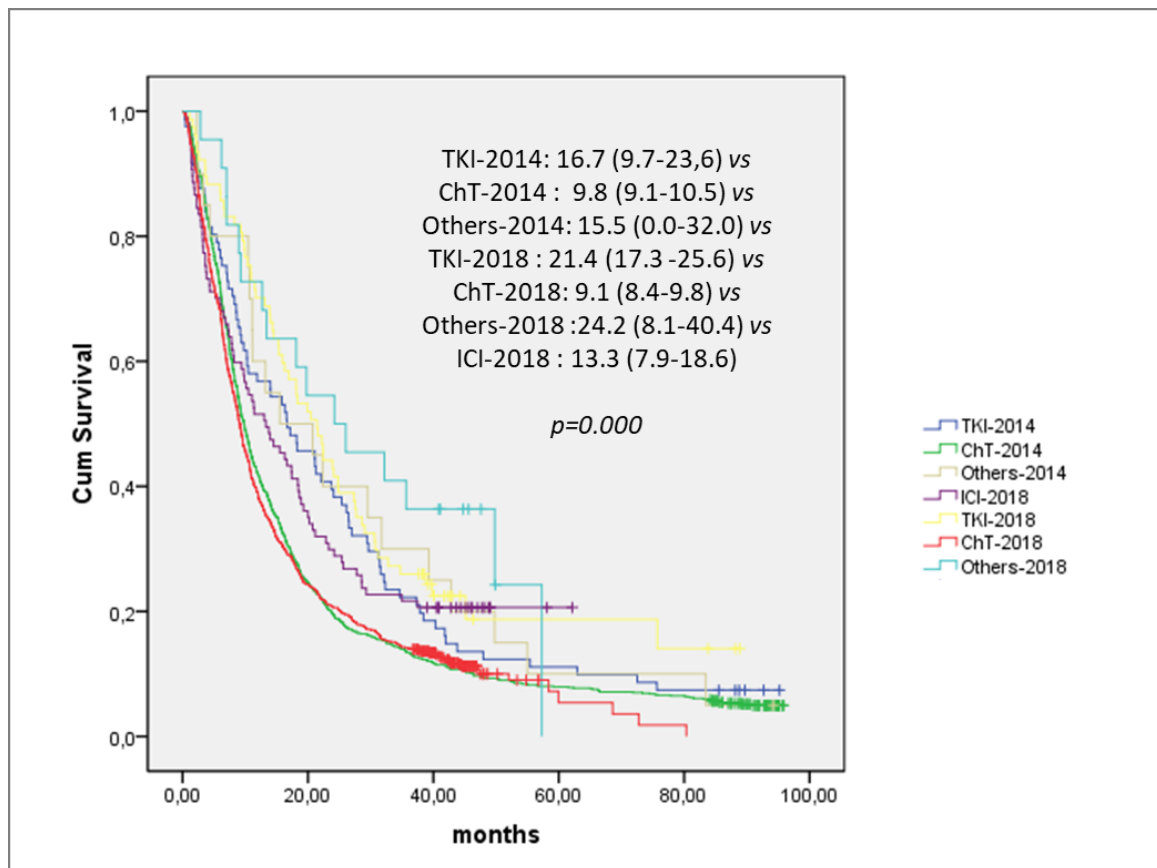

**Figure S4.** Kaplan-Meier curves for estimating overall survival among patients treated for unresectable tumors by therapeutic group and year of treatment initiation. Note: TKI: tirosin-kinassa inhibitors targeting EGFR mutations, ALK translocations and ROS-1 translocation; ChT: topoisomerase 1 inhibitors; antifolate, platinum, pyrimidine analogues, podophyllotoxin derivative, taxane, vinca alkaloids. Others: Anti-angiogenic therapy, TKI targeting MEK, BRAF and mTOR, EGFR inhibitors
